# Supplementary material for: Habitual physical activity is associated with lower fasting and greater glucose-induced GLP-1 response in men
Source: PubMed Central journal article supplement — Endocr Connect. 2019 Nov 21;8(12):1607–17. doi: 10.1530/EC-19-0408 (PMC6933827; doi:10.1530/ec-19-0408), 2019-11-21
Supplement: supplementary_table_1.pdf [file supplementary_table_1.pdf]

**Table S1: Dropout analysis.**

Characteristics of ADDITION-PRO participants included and not included in the present study.

|                                 | <b>Not included</b> | <b>Included</b>  | <b>P</b> |
|---------------------------------|---------------------|------------------|----------|
| N                               | 756                 | 1326             |          |
| Age (y)                         | 66 (7)              | 66 (7)           | 0.587    |
| Men (%)                         | 54.1 (50.5;57.7)    | 53.0 (50.3;55.7) | 0.633    |
| Current smokers (%)             | 20.0 (17.2;23.0)    | 15.8 (13.9;17.9) | 0.017    |
| Glucose tolerance status (%)    |                     |                  |          |
| NGT                             | 27.6 (24.5;31.0)    | 53.0 (50.3;55.7) | <0.001   |
| Pre-diabetes                    | 21.2 (18.3;24.3)    | 35.6 (33.0;38.2) | <0.001   |
| Screen detected diabetes        | 4.2 (2.9;5.9)       | 11.4 (9.7;13.2)  | <0.001   |
| Known diabetes                  | 45.6 (42.0;49.3)    | -                | -        |
| BMI (kg/m <sup>2</sup> )        | 28.8 (4.9)          | 27.1 (4.5)       | <0.001   |
| Systolic blood pressure (mmHg)  | 134 (18)            | 133 (17)         | 0.806    |
| Diastolic blood pressure (mmHg) | 82 (11)             | 81 (10)          | 0.017    |
| Fasting plasma glucose (mmol/L) | 6.0 (0.9)           | 6.0 (0.8)        | 0.455    |
| 2-hour plasma glucose (mmol/L)  | 7.0 (2.5)           | 6.8 (2.3)        | 0.064    |
| Fasting serum insulin (pmol/L)  | 40 (26;61)          | 37 (25;55)       | 0.083    |
| 2-hour serum insulin (pmol/L)   | 221 (122;378)       | 184 (110;313)    | 0.002    |
| ISI <sub>0-120</sub>            | 33.2 (24.3;48.2)    | 36.9 (25.9;48.8) | 0.118    |

Data are the means (SD), medians (interquartile range) or percentages (95% CI). P: p-value for test of difference

between groups. *Abbreviations:* Normal glucose tolerance (NGT); insulin sensitivity index (ISI<sub>0-120</sub>).
