# Supplementary material for: Habitual physical activity is associated with lower fasting and greater glucose-induced GLP-1 response in men
Source: PubMed Central journal article supplement — Endocr Connect. 2019 Nov 21;8(12):1607–17. doi: 10.1530/EC-19-0408 (PMC6933827; doi:10.1530/ec-19-0408), 2019-11-21
Supplement: supplementary_table_2.pdf [file supplementary_table_2.pdf]

**Table S2: Sensitivity analysis for the subset of participants with cardiorespiratory fitness data available ( $n=793$ ).**

Estimated percentage change (95% CI) in fasting and glucose-stimulated response GLP-1 in plasma by a unit increase in PAEE (kJ/kg/day), MVPA (hours/day), and CRF (ml O<sub>2</sub>/kg/min).

|                                   | Model | PAEE                   |              | MVPA                      |              | CRF                    |              |
|-----------------------------------|-------|------------------------|--------------|---------------------------|--------------|------------------------|--------------|
|                                   |       | Difference             | <i>P</i>     | Difference                | <i>P</i>     | Difference             | <i>P</i>     |
| <b>Women (<math>n=356</math>)</b> |       |                        |              |                           |              |                        |              |
| Fasting plasma GLP-1 (% change)   | 1     | 0.2(-0.5;0.8)          | 0.640        | -12.8(-35.8;18.4)         | 0.379        | 0.5(-1.4;2.5)          | 0.588        |
|                                   | 2     | 0.2(-0.5;0.9)          | 0.619        | -10.9(-34.6;21.4)         | 0.464        | 0.7(-1.4;3)            | 0.500        |
| rAUC <sub>0-30</sub> (% change)   | 1     | -0.2(-0.7;0.3)         | 0.405        | -0.5(-22;26.9)            | 0.968        | 0.1(-1.4;1.7)          | 0.862        |
|                                   | 2     | -0.4(-1;0.1)           | 0.116        | -0.5(-22.1;27)            | 0.967        | -0.6(-2.3;1.1)         | 0.463        |
| rAUC <sub>0-120</sub> (% change)  | 1     | -0.2(-0.8;0.4)         | 0.479        | -2.8(-25.8;27.3)          | 0.835        | 0.2(-1.5;2)            | 0.784        |
|                                   | 2     | -0.5(-1.1;0.1)         | 0.102        | -3.6(-26.4;26.2)          | 0.789        | -0.8(-2.7;1.1)         | 0.391        |
| <b>Men (<math>n=437</math>)</b>   |       |                        |              |                           |              |                        |              |
| Fasting plasma GLP-1 (% change)   | 1     | <b>-0.6(-1.1;-0.2)</b> | <b>0.006</b> | <b>-30.2(-43.8;-13.3)</b> | <b>0.001</b> | <b>-2.0(-3.3;-0.7)</b> | <b>0.004</b> |
|                                   | 2     | <b>-0.6(-1.1;-0.1)</b> | <b>0.019</b> | <b>-29.1(-42.9;-12.1)</b> | <b>0.002</b> | <b>-1.9(-3.3;-0.5)</b> | <b>0.010</b> |
| rAUC <sub>0-30</sub> (% change)   | 1     | 0.2(-0.2;0.5)          | 0.269        | <b>18.7(0.8;39.7)</b>     | <b>0.040</b> | 0.0(-1;1.1)            | 0.945        |
|                                   | 2     | 0.1(-0.3;0.4)          | 0.666        | <b>17.8(0.1;38.6)</b>     | <b>0.048</b> | -0.3(-1.4;0.8)         | 0.581        |
| rAUC <sub>0-120</sub> (% change)  | 1     | 0.3(-0.1;0.7)          | 0.100        | <b>27.6(5.9;53.7)</b>     | <b>0.011</b> | 0.5(-0.7;1.7)          | 0.441        |
|                                   | 2     | 0.2(-0.2;0.6)          | 0.386        | <b>25.9(4.6;51.6)</b>     | <b>0.015</b> | 0.0(-1.2;1.3)          | 0.987        |

Data are percentage change with 95% CI. *P*: p-value for test of significance of the association.

*Abbreviations*: Physical activity energy expenditure (PAEE); moderate-to-vigorous physical activity (MVPA); cardiorespiratory fitness (CRF); glucagon-like peptide-1 (GLP-1). Peak glucose-stimulated response 30 min after glucose ingestion (rAUC<sub>0-30</sub>), full glucose-stimulated response 120 min after glucose ingestion (rAUC<sub>0-120</sub>).

Model 1: Adjusted for age. Model 2: Further adjusted for BMI and peripheral insulin sensitivity (ISI<sub>0-120</sub>). MVPA is further adjusted for PAEE so an increase in MVPA is at the expense of a decrease in a less intensive physical activity (MET $\leq$ 3.0).
